# Supplementary material
Source: PubMed Central journal article supplement (PMC2706187)
Supplement: rspb20070417s07.pdf [file rspb20070417s07.pdf]

RSPB20070417

**Electronic supplementary material A (table 2)**  
**Species-specific data**

List of study species together with taxonomical and growth form affiliation, and data source provenance (table 2). Also, scores of several estimated parameters and means of variables of interest to the study.  $\beta$  is the scaling exponent of the power relation of leaf mass and leaf area ( $LM = \alpha LA^\beta$ , calculated  $\beta$  and 95% CI limits are shown).  $R^2$  is the goodness-of-fit of the RMA regression between (log)LA and (log)LM used to estimate  $\beta$ . Sample size is the number of leaves where LA and LM were measured separately. LM, LA and SLA (specific leaf area, LA/LM) are the arithmetic means of those variables for each species.  $LA_{VAR}$  is the ratio of LA of the largest to the smallest leaf of each species.  $SLA_{VAR}$  shows the proportional change of SLA that would occur across the range of observed leaf sizes of each species (based on the ratio of the largest to the smallest leaf ) calculated from the RMA regression parameters ( $\alpha$  and  $\beta$ ) obtained for each species. Growth form categories: T, tree; S, shrub; V, vine; H, herb; G, grass. Leaf habit in parentheses: (d), deciduous; (e), evergreen; (sd), semi-deciduous. See table 1 for full reference of each data source.

Table 2.

| species                         | $\beta$ (95% CI)    | $r^2$ | sample size per species | LM (g) | LA (cm <sup>2</sup> ) | SLA (cm <sup>2</sup> g <sup>-1</sup> ) | L <sub>AVAR</sub> | SLA <sub>AVAR</sub> | growth form | family          | data source    |
|---------------------------------|---------------------|-------|-------------------------|--------|-----------------------|----------------------------------------|-------------------|---------------------|-------------|-----------------|----------------|
| <i>Acer negundo</i>             | 1.073 (0.946–1.219) | 0.975 | 10                      | 0.157  | 23.88                 | 152.41                                 | 3.42              | 0.91                | T(d)        | Sopindaceae     | Shipley        |
| <i>Acer platanoides</i>         | 1.065(0.968–1.171)  | 0.939 | 30                      | 0.178  | 39.54                 | 221.82                                 | 30.11             | 0.80                | T(d)        | Sapindaceae     | Roderick       |
| <i>Acer rubrum</i>              | 1.134 (0.885–1.451) | 0.906 | 10                      | 0.033  | 10.02                 | 303.39                                 | 2.85              | 0.87                | T(d)        | Sapindaceae     | Reich2         |
| <i>Acer saccharum</i>           | 1.19(0.982–1.442)   | 0.944 | 10                      | 0.100  | 39.63                 | 394.46                                 | 2.66              | 0.83                | T(d)        | Sapindaceae     | Shipley        |
| <i>Alnus rhombifolia</i>        | 1.14(1.045–1.243)   | 0.950 | 30                      | 0.433  | 52.72                 | 121.90                                 | 6.55              | 0.77                | H(d)        | Rosaceae        | Reich4         |
| <i>Amelanchier ovalis</i>       | 0.913 (0.836–0.997) | 0.896 | 56                      | 0.027  | 2.74                  | 102.57                                 | 5.82              | 1.17                | T(d)        | Betulaceae      | Roderick       |
| <i>Amorpha canescens</i>        | 1.159 (0.863–1.556) | 0.843 | 11                      | 0.071  | 10.30                 | 144.88                                 | 2.67              | 0.86                | S(d)        | Rosaceae        | Milla1         |
| <i>Anaxagorea dolichocarpa</i>  | 1.227(1.096–1.373)  | 0.955 | 18                      | 0.387  | 47.75                 | 123.31                                 | 3.04              | 0.78                | S(d)        | Fabaceae        | Reich2         |
| <i>Andropogon gerardi</i>       | 1.133 (0.952–1.348) | 0.946 | 11                      | 0.068  | 11.09                 | 163.68                                 | 2.83              | 0.87                | T(c)        | Annaceae        | Barloto        |
| <i>Arbutus unedo</i>            | 1.11(1.008–1.221)   | 0.831 | 75                      | 0.132  | 8.36                  | 63.53                                  | 4.22              | 0.85                | G(d)        | Poaceae         | Reich2         |
| <i>Aster azureus</i>            | 0.817 (0.661–1.01)  | 0.920 | 11                      | 0.044  | 10.86                 | 248.31                                 | 6.86              | 1.42                | S(c)        | Ericaceae       | Milla1         |
| <i>Aster lanceolatus</i>        | 1.006(0.889–1.138)  | 0.977 | 10                      | 0.018  | 3.69                  | 204.64                                 | 2.86              | 0.99                | H(d)        | Asteraceae      | Reich2         |
| <i>Bertholletia excelsa</i>     | 0.995(0.819–1.21)   | 0.932 | 11                      | 3.027  | 240.99                | 79.62                                  | 3.98              | 1.01                | H(d)        | Asteraceae      | Shipley        |
| <i>Betula nana</i>              | 0.982 (0.788–1.222) | 0.801 | 20                      | 0.005  | 0.55                  | 120.23                                 | 2.21              | 0.89                | T(c)        | Lecythidaceae   | Reich3         |
| <i>Betula alleghaniensis</i>    | 1.151 (0.974–1.359) | 0.958 | 10                      | 0.059  | 26.85                 | 454.99                                 | 6.00              | 0.85                | T(d)        | Betulaceae      | Shipley        |
| <i>Betula jacquemontii</i>      | 1.089(0.999–1.188)  | 0.950 | 30                      | 0.318  | 37.33                 | 117.22                                 | 2.25              | 1.01                | T(d)        | Betulaceae      | Roderick       |
| <i>Betula pendula</i>           | 1.248(1.116–1.397)  | 0.820 | 59                      | 0.059  | 7.38                  | 125.31                                 | 2.67              | 0.78                | S(d)        | Betulaceae      | Kudo           |
| <i>Betula populifolia</i>       | 0.843(0.668–1.066)  | 0.916 | 10                      | 0.069  | 10.79                 | 157.40                                 | 4.68              | 1.27                | T(d)        | Betulaceae      | Niinemets      |
| <i>Bistorta bistortoides</i>    | 1.094 (1.014–1.18)  | 0.967 | 26                      | 0.124  | 14.66                 | 118.30                                 | 6.53              | 0.84                | T(d)        | Betulaceae      | Shipley        |
| <i>Bonafousia disticha</i>      | 1.07(0.804–1.425)   | 0.852 | 11                      | 0.339  | 49.77                 | 146.89                                 | 2.53              | 0.94                | H(d)        | Polygonaceae    | Reich4         |
| <i>Brachycton megaphyllus</i>   | 0.997 (0.868–1.144) | 0.932 | 18                      | 2.692  | 275.42                | 102.33                                 | 6.50              | 1.01                | T(c)        | Apocynaceae     | Barloto        |
| <i>Bromus erectus</i>           | 0.939 (0.907–0.974) | 0.946 | 168                     | 0.066  | 15.07                 | 229.09                                 | 22.20             | 1.21                | T(d)        | Malvaceae       | Prior          |
| <i>Buchanania obovata</i>       | 1.145(1.003–1.308)  | 0.937 | 18                      | 2.377  | 144.54                | 60.81                                  | 4.25              | 0.81                | G(d)        | Poaceae         | Roumet         |
| <i>Bupleurum fruticosum</i>     | 1.088 (1.049–1.128) | 0.977 | 72                      | 0.076  | 5.35                  | 70.31                                  | 10.99             | 0.81                | T(sd)       | Anacardiaceae   | Prior          |
| <i>Buxus sempervirens</i>       | 1.224 (1.133–1.322) | 0.891 | 75                      | 0.020  | 1.27                  | 63.97                                  | 2.83              | 0.79                | S(c)        | Apiaceae        | Milla1         |
| <i>Callistemon viminalis</i>    | 0.893 (0.79–1.009)  | 0.942 | 19                      | 0.105  | 8.77                  | 83.37                                  | 4.26              | 1.17                | S(c)        | Buxaceae        | Milla1         |
| <i>Caraiipa heterocarpa</i>     | 1.055(0.926–1.201)  | 0.843 | 40                      | 0.313  | 45.71                 | 146.22                                 | 9.36              | 0.64                | T(c)        | Myrtaceae       | Roderick       |
| <i>Carpinus caroliniana</i>     | 1.203(1.114–1.3)    | 0.855 | 98                      | 0.044  | 10.23                 | 230.67                                 | 4.81              | 0.92                | T(d)        | Betulaceae      | Williams-Liner |
| <i>Cassandra calyculata</i>     | 1.245(0.935–1.658)  | 0.873 | 10                      | 0.021  | 2.06                  | 99.54                                  | 2.18              | 0.83                | T(c)        | Clusiaceae      | Reich1         |
| <i>Cassipourea guianensis</i>   | 1.129 (1.032–1.236) | 0.973 | 17                      | 0.298  | 38.11                 | 127.94                                 | 10.74             | 0.74                | S(c)        | Ericaceae       | Shipley        |
| <i>Cecropia ficifolia</i>       | 1.157 (1.05–1.276)  | 0.881 | 52                      | 1.671  | 233.35                | 139.64                                 | 5.67              | 0.76                | T(c)        | Rhizophoraceae  | Barloto        |
| <i>Centaurea nigra</i>          | 1.113(0.935–1.326)  | 0.954 | 10                      | 0.015  | 2.75                  | 181.55                                 | 2.34              | 0.91                | T(c)        | Moraceae        | Reich1         |
| <i>Cercis occidentalis</i>      | 0.901 (0.774–1.049) | 0.845 | 30                      | 0.113  | 17.66                 | 155.96                                 | 3.29              | 1.13                | H(d)        | Asteraceae      | Shipley        |
| <i>Cirmamomum effusum</i>       | 1.14(1.048–1.241)   | 0.823 | 99                      | 0.272  | 34.04                 | 125.03                                 | 6.62              | 0.77                | T(d)        | Fabaceae        | Roderick       |
| <i>Clethra mexicana</i>         | 0.988 (0.938–1.039) | 0.935 | 99                      | 0.664  | 63.39                 | 95.50                                  | 32.22             | 1.04                | T(c)        | Lauraceae       | Williams-Liner |
| <i>Clidemia sericea</i>         | 1.141 (0.975–1.334) | 0.905 | 19                      | 0.535  | 68.39                 | 127.94                                 | 3.59              | 0.84                | T(d)        | Clethraceae     | Williams-Liner |
| <i>Cochlospermum fraseri</i>    | 1.075(0.935–1.237)  | 0.930 | 18                      | 0.468  | 77.98                 | 166.72                                 | 3.14              | 0.92                | T(c)        | Melastomataceae | Reich1         |
| <i>Comandra richardiana</i>     | 1.147 (0.843–1.561) | 0.853 | 10                      | 0.004  | 0.84                  | 202.77                                 | 5.35              | 0.78                | T(d)        | Bixaceae        | Prior          |
| <i>Convolvulus mauritanicus</i> | 1.183 (1.028–1.361) | 0.868 | 30                      | 0.009  | 2.01                  | 231.74                                 | 2.73              | 0.83                | H(d)        | Santalaceae     | Reich2         |

(Continued.)

Table 2. (Continued.)

| species                            | $\beta$ (95% CI)    | $r^2$ | sample size per species | LM (g) | LA (cm <sup>2</sup> ) | SLA (cm <sup>2</sup> g <sup>-1</sup> ) | LA <sub>VAR</sub> | SLA <sub>VAR</sub> | growth form | family          | data source |
|------------------------------------|---------------------|-------|-------------------------|--------|-----------------------|----------------------------------------|-------------------|--------------------|-------------|-----------------|-------------|
| <i>Gordia sagotii</i>              | 0.956 (0.77–1.186)  | 0.928 | 10                      | 1.820  | 216.77                | 119.12                                 | 4.39              | 1.07               | H(d)        | Convolvulaceae  | Roderick    |
| <i>Gordia</i> sp.                  | 1.269 (0.981–1.641) | 0.864 | 12                      | 1.409  | 176.20                | 125.03                                 | 7.67              | 0.58               | T(e)        | Boraginaceae    | Baraloto    |
| <i>Cornus stolonifera</i>          | 1.313 (1.125–1.532) | 0.964 | 10                      | 0.130  | 25.00                 | 192.75                                 | 3.30              | 0.69               | T(e)        | Boraginaceae    | Baraloto    |
| <i>Crudia bracteata</i>            | 1.004 (0.883–1.142) | 0.949 | 16                      | 0.150  | 26.61                 | 177.83                                 | 4.55              | 0.99               | S(d)        | Cornaceae       | Shipley     |
| <i>Cupania scrobiculata</i>        | 1.211 (0.949–1.546) | 0.878 | 12                      | 0.425  | 44.06                 | 103.75                                 | 2.59              | 0.82               | T(e)        | Fabaceae        | Baraloto    |
| <i>Dactylis glomerata</i>          | 1.002 (0.977–1.027) | 0.973 | 169                     | 0.101  | 27.10                 | 269.15                                 | 53.27             | 0.99               | T(e)        | Sapindaceae     | Baraloto    |
| <i>Diapensia lappionica</i>        | 1.002 (0.811–1.239) | 0.932 | 10                      | 0.001  | 0.07                  | 60.95                                  | 2.13              | 1.00               | G(d)        | Poaceae         | Baraloto    |
| <i>Empetrum hermaphroditum</i>     | 1.038 (0.854–1.261) | 0.843 | 20                      | 0.001  | 0.04                  | 60.12                                  | 1.87              | 0.98               | S(e)        | Diapensiaceae   | Roumet      |
| <i>Eperua falcata</i>              | 1.028 (0.926–1.142) | 0.901 | 39                      | 0.244  | 39.08                 | 159.96                                 | 5.06              | 0.96               | S(e)        | Ericaceae       | Kudo        |
| <i>Eperua grandiflora</i>          | 0.961 (0.741–1.247) | 0.807 | 15                      | 0.527  | 69.02                 | 130.92                                 | 2.05              | 1.03               | T(e)        | Fabaceae        | Baraloto    |
| <i>Eperua leucantha</i>            | 1.103 (1.018–1.196) | 0.945 | 37                      | 0.447  | 63.24                 | 141.58                                 | 5.71              | 0.84               | T(e)        | Fabaceae        | Baraloto    |
| <i>Eperua purpurea</i>             | 1.077 (0.988–1.173) | 0.960 | 25                      | 0.232  | 38.99                 | 167.88                                 | 4.88              | 0.89               | T(e)        | Fabaceae        | Reich1      |
| <i>Erythrina poeppigiana</i>       | 1.278 (1.088–1.501) | 0.947 | 12                      | 0.334  | 68.39                 | 204.64                                 | 3.20              | 0.98               | T(e)        | Fabaceae        | Reich1      |
| <i>Erythrophleum chlorostachys</i> | 1.019 (0.845–1.23)  | 0.873 | 18                      | 0.206  | 20.75                 | 100.69                                 | 3.21              | 0.72               | T(sd)       | Fabaceae        | Prior       |
| <i>Eschweilera coriacea</i>        | 1.107 (0.992–1.236) | 0.831 | 58                      | 1.164  | 129.72                | 111.43                                 | 4.77              | 0.85               | T(e)        | Fabaceae        | Reich3      |
| <i>Eschweilera sagotiana</i>       | 1.109 (1–1.231)     | 0.863 | 53                      | 1.371  | 127.94                | 93.33                                  | 4.32              | 0.85               | T(e)        | Lecythidaceae   | Baraloto    |
| <i>Eucalyptus foelscheana</i>      | 1.056 (0.959–1.162) | 0.967 | 18                      | 1.782  | 80.91                 | 45.39                                  | 14.32             | 0.92               | T(e)        | Lecythidaceae   | Baraloto    |
| <i>Eucalyptus tetradonta</i>       | 1.071 (0.894–1.284) | 0.881 | 18                      | 1.462  | 80.91                 | 55.34                                  | 5.83              | 0.91               | T(e)        | Myrtaceae       | Roderick    |
| <i>Eucalyptus ficifolia</i>        | 1.032 (0.877–1.215) | 0.829 | 29                      | 0.322  | 25.70                 | 79.80                                  | 4.79              | 0.68               | T(e)        | Myrtaceae       | Prior       |
| <i>Eucalyptus pauciflora</i>       | 1.242 (1.121–1.377) | 0.929 | 30                      | 0.583  | 26.00                 | 44.57                                  | 2.84              | 0.93               | T(e)        | Myrtaceae       | Roderick    |
| <i>Fabaceae</i> sp1                | 1.235 (1.101–1.384) | 0.899 | 34                      | 1.180  | 155.60                | 131.83                                 | 3.17              | 0.76               | T(e)        | Myrtaceae       | Prior       |
| <i>Ficus racemosa</i>              | 1.166 (0.952–1.427) | 0.852 | 18                      | 0.454  | 69.18                 | 152.41                                 | 2.81              | 0.84               | T(e)        | Fabaceae        | Reich1      |
| <i>Ficus scobina</i>               | 0.911 (0.726–1.142) | 0.815 | 18                      | 0.310  | 37.76                 | 121.62                                 | 2.53              | 1.09               | T(sd)       | Moraceae        | Prior       |
| <i>Fraxinus americana</i>          | 1.206 (1.083–1.343) | 0.983 | 10                      | 0.061  | 27.80                 | 458.14                                 | 6.30              | 0.68               | T(sd)       | Moraceae        | Prior       |
| <i>Geum macrophyllum</i>           | 0.955 (0.776–1.175) | 0.822 | 20                      | 0.023  | 8.20                  | 363.92                                 | 8.86              | 1.10               | T(d)        | Oleaceae        | Shipley     |
| <i>Geum rosi</i>                   | 1.061 (0.895–1.259) | 0.864 | 22                      | 0.050  | 4.20                  | 83.95                                  | 3.58              | 0.93               | H(d)        | Rosaceae        | Shipley     |
| <i>Ginkgo biloba</i>               | 1.002 (0.918–1.093) | 0.949 | 30                      | 0.162  | 20.37                 | 125.60                                 | 9.35              | 1.00               | T(d)        | Ginkgoaceae     | Roderick    |
| <i>Goupta glabra</i>               | 1.401 (1.28–1.534)  | 0.958 | 24                      | 0.659  | 83.75                 | 127.06                                 | 5.13              | 0.52               | T(e)        | Celastraceae    | Reich1      |
| <i>Hedera helix</i>                | 1.025 (0.947–1.109) | 0.959 | 30                      | 0.115  | 24.49                 | 213.80                                 | 23.81             | 0.92               | V(e)        | Araliaceae      | Roderick    |
| <i>Henriettella flavescens</i>     | 1.122 (1.009–1.247) | 0.863 | 51                      | 0.641  | 81.28                 | 126.77                                 | 4.58              | 0.83               | T(e)        | Melastomataceae | Baraloto    |
| <i>Hevea brasiliensis</i>          | 1.764 (1.323–2.352) | 0.829 | 12                      | 0.319  | 42.07                 | 131.83                                 | 2.12              | 0.56               | T(e)        | Euphorbiaceae   | Reich3      |
| <i>Hieracium aurantiacum</i>       | 1.061 (0.754–1.494) | 0.817 | 10                      | 0.022  | 8.83                  | 396.28                                 | 3.74              | 0.92               | H(d)        | Asteraceae      | Shipley     |
| <i>Hypericum calycinum</i>         | 0.939 (0.869–1.016) | 0.959 | 30                      | 0.100  | 8.67                  | 86.30                                  | 2.93              | 1.07               | H(d)        | Clusiaceae      | Roderick    |
| <i>Impatiens pallida</i>           | 1.16 (0.89–1.511)   | 0.892 | 10                      | 0.019  | 15.14                 | 803.53                                 | 2.69              | 0.85               | H(d)        | Balsaminaceae   | Shipley     |
| <i>Inga</i> sp4                    | 1.014 (0.898–1.144) | 0.856 | 42                      | 0.361  | 43.85                 | 121.34                                 | 4.37              | 0.98               | T(e)        | Fabaceae        | Baraloto    |
| <i>Inga stipularis</i>             | 1.026 (0.963–1.094) | 0.963 | 39                      | 0.589  | 58.75                 | 99.77                                  | 4.87              | 0.96               | T(e)        | Fabaceae        | Baraloto    |
| <i>Iryanthera hostmannii</i>       | 1.323 (1.167–1.501) | 0.906 | 27                      | 0.558  | 61.24                 | 109.65                                 | 4.31              | 0.62               | T(e)        | Myristicaceae   | Baraloto    |
| <i>Iryanthera sagotiana</i>        | 0.995 (0.899–1.101) | 0.874 | 51                      | 0.316  | 39.45                 | 124.74                                 | 5.48              | 1.01               | T(e)        | Myristicaceae   | Baraloto    |
| <i>Jacaranda copaia</i>            | 1.505 (1.267–1.788) | 0.870 | 21                      | 0.105  | 20.65                 | 197.24                                 | 6.33              | 0.39               | T(e)        | Bignoniaceae    | Baraloto    |

| species                            | $\beta$ (95% CI)    | $r^2$ | sample size per species | LM (g) | LA (cm <sup>2</sup> ) | SLA (cm <sup>2</sup> g <sup>-1</sup> ) | LA <sub>VAR</sub> | SLA <sub>VAR</sub> | growth form | family           | data source    |
|------------------------------------|---------------------|-------|-------------------------|--------|-----------------------|----------------------------------------|-------------------|--------------------|-------------|------------------|----------------|
| <i>Kalmia augustifolia</i>         | 0.778 (0.626–0.968) | 0.927 | 10                      | 0.031  | 2.84                  | 92.47                                  | 2.31              | 1.20               | S(e)        | Ericaceae        | Shipley        |
| <i>Lecythis chirtacea</i>          | 1.09(0.97–1.226)    | 0.972 | 12                      | 0.364  | 61.38                 | 168.66                                 | 3.28              | 0.90               | T(e)        | Lecythidaceae    | Baraloto       |
| <i>Lecythis idatinota</i>          | 0.978 (0.88–1.087)  | 0.951 | 21                      | 0.502  | 54.45                 | 108.39                                 | 6.45              | 1.04               | T(e)        | Lecythidaceae    | Baraloto       |
| <i>Lepidodes capitata</i>          | 0.952 (0.745–1.216) | 0.846 | 14                      | 0.035  | 4.44                  | 127.64                                 | 3.46              | 1.06               | H(d)        | Fabaceae         | Reich2         |
| <i>Licania membranacea</i>         | 0.92 (0.831–1.019)  | 0.890 | 45                      | 0.532  | 50.82                 | 95.50                                  | 10.85             | 1.21               | T(e)        | Chrysobalanaceae | Baraloto       |
| <i>Licania heteromorpha</i>        | 1.118(1.003–1.246)  | 0.912 | 33                      | 0.582  | 60.95                 | 104.71                                 | 4.91              | 0.83               | T(e)        | Chrysobalanaceae | Reich1         |
| <i>Liquidambar styraciflua</i>     | 1.018(0.981–1.057)  | 0.967 | 95                      | 0.114  | 26.98                 | 236.05                                 | 26.30             | 0.94               | T(d)        | Hamamelidaceae   | Williams-Liner |
| <i>Lonicera implexa</i>            | 1.218 (1.091–1.361) | 0.890 | 39                      | 0.060  | 4.22                  | 70.15                                  | 3.94              | 0.74               | V(e)        | Caprifoliaceae   | Milla1         |
| <i>Lythrum salicaria</i>           | 1.407 (1.037–1.908) | 0.856 | 10                      | 0.018  | 3.14                  | 171.40                                 | 2.18              | 0.73               | H(d)        | Lythraceae       | Shipley        |
| <i>Magnolia schiedana</i>          | 1.159(1.091–1.233)  | 0.908 | 99                      | 0.676  | 66.07                 | 97.72                                  | 5.50              | 0.76               | T(e)        | Magnoliaceae     | Williams-Liner |
| <i>Maianthemum canadense</i>       | 1.154 (1.012–1.316) | 0.960 | 13                      | 0.034  | 11.80                 | 349.14                                 | 8.66              | 0.72               | H(d)        | Liliaceae        | Reich2         |
| <i>Manihot esculenta</i>           | 0.991 (0.841–1.167) | 0.918 | 16                      | 0.358  | 87.10                 | 243.22                                 | 2.52              | 1.01               | S(e)        | Euphorbiaceae    | Reich1         |
| <i>Melaleuca viridifolia</i>       | 0.933 (0.806–1.078) | 0.924 | 18                      | 0.501  | 21.63                 | 43.15                                  | 5.22              | 0.79               | T(d)        | Meliaceae        | Roderick       |
| <i>Melia azedarach</i>             | 1.139 (1.019–1.272) | 0.918 | 30                      | 0.045  | 8.51                  | 187.93                                 | 6.22              | 1.13               | T(e)        | Myrtaceae        | Prior          |
| <i>Miconia dispar</i>              | 0.821 (0.623–1.081) | 0.824 | 13                      | 2.415  | 224.91                | 93.11                                  | 4.94              | 1.33               | T(e)        | Melastomataceae  | Reich1         |
| <i>Miconia tchudyooides</i>        | 1.196(1.108–1.291)  | 0.926 | 53                      | 1.202  | 143.22                | 119.12                                 | 5.56              | 0.98               | T(e)        | Sapotaceae       | Reich1         |
| <i>Micrantha sprucei</i>           | 1.213 (1.057–1.393) | 0.847 | 35                      | 1.205  | 102.80                | 85.31                                  | 4.97              | 0.71               | T(e)        | Euphorbiaceae    | Reich1         |
| <i>Micropholis maguirei</i>        | 1.014(0.908–1.132)  | 0.905 | 34                      | 1.057  | 82.99                 | 78.52                                  | 14.06             | 0.60               | T(e)        | Melastomataceae  | Baraloto       |
| <i>Myrtacea sp5</i>                | 0.844 (0.747–0.954) | 0.900 | 30                      | 0.351  | 56.89                 | 162.18                                 | 3.61              | 1.22               | T(e)        | Myrtaceae        | Baraloto       |
| <i>Neea obovata</i>                | 1.03(0.921–1.151)   | 0.894 | 37                      | 0.231  | 22.65                 | 97.95                                  | 14.47             | 0.92               | T(e)        | Nyctaginaceae    | Reich1         |
| <i>Ocotea costulata</i>            | 0.874 (0.785–0.974) | 0.924 | 29                      | 0.557  | 77.27                 | 138.68                                 | 5.58              | 1.24               | T(e)        | Lauraceae        | Reich1         |
| <i>Ostrya virginiana</i>           | 1.1 (0.915–1.323)   | 0.948 | 10                      | 0.050  | 26.55                 | 528.45                                 | 3.12              | 0.89               | T(d)        | Betulaceae       | Shipley        |
| <i>Palicoirea guianensis</i>       | 1.039 (0.973–1.109) | 0.968 | 33                      | 1.023  | 143.88                | 140.60                                 | 22.18             | 0.89               | T(e)        | Rubiaceae        | Baraloto       |
| <i>Panicum praeceocius</i>         | 1.063 (0.978–1.154) | 0.988 | 11                      | 0.007  | 2.22                  | 308.32                                 | 5.43              | 0.90               | G(d)        | Poaceae          | Reich2         |
| <i>Parthenocissus quinquefolia</i> | 1.04(0.826–1.31)    | 0.891 | 12                      | 0.090  | 45.60                 | 505.82                                 | 5.76              | 0.93               | V(d)        | Vitaceae         | Reich2         |
| <i>Paspalum virgatum</i>           | 1.277(1.027–1.587)  | 0.891 | 13                      | 0.270  | 34.12                 | 126.47                                 | 2.48              | 0.61               | V(e)        | Passifloraceae   | Reich3         |
| <i>Passiflora edulis</i>           | 1.546 (1.205–1.984) | 0.823 | 15                      | 0.422  | 92.04                 | 218.27                                 | 2.54              | 0.77               | G(e)        | Poaceae          | Reich3         |
| <i>Pedicularis lapponica</i>       | 1.228 (1.058–1.425) | 0.909 | 20                      | 0.006  | 0.69                  | 109.14                                 | 3.35              | 0.76               | H(d)        | Scrophulariaceae | Kudo           |
| <i>Pistacia lentiscus</i>          | 1.138 (1.058–1.223) | 0.903 | 75                      | 0.028  | 1.54                  | 55.85                                  | 3.44              | 0.84               | S(e)        | Anacardiaceae    | Milla1         |
| <i>Pistacia terebinthus</i>        | 1.121 (1.027–1.225) | 0.857 | 75                      | 0.079  | 6.84                  | 86.50                                  | 3.95              | 0.85               | S(d)        | Anacardiaceae    | Milla1         |
| <i>Planchonia careya</i>           | 0.874 (0.708–1.079) | 0.840 | 18                      | 0.552  | 66.07                 | 119.67                                 | 2.98              | 1.15               | T(d)        | Lecythidaceae    | Prior          |
| <i>Pogonophora schomburgkiana</i>  | 0.937 (0.797–1.101) | 0.886 | 21                      | 0.352  | 50.12                 | 142.23                                 | 5.59              | 1.11               | T(e)        | Euphorbiaceae    | Baraloto       |
| <i>Polygonum sagittatum</i>        | 0.927 (0.768–1.12)  | 0.946 | 10                      | 0.009  | 6.00                  | 665.27                                 | 3.66              | 1.10               | H(d)        | Polygonaceae     | Shipley        |
| <i>Populus nigra</i>               | 1.022(1.002–1.043)  | 0.997 | 30                      | 0.116  | 20.28                 | 174.58                                 | 23.09             | 0.93               | T(d)        | Salicaceae       | Roderick       |
| <i>Populus tremula</i>             | 1.172 (1.111–1.236) | 0.904 | 133                     | 0.278  | 32.14                 | 115.61                                 | 6.30              | 0.73               | T(d)        | Salicaceae       | Niinemets      |
| <i>Populus tremuloides</i>         | 1.057 (0.818–1.366) | 0.899 | 10                      | 0.210  | 27.67                 | 131.52                                 | 2.74              | 0.94               | T(d)        | Salicaceae       | Shipley        |
| <i>Pradosia cochlearia</i>         | 1.172 (1.024–1.342) | 0.911 | 23                      | 0.175  | 26.24                 | 149.97                                 | 3.04              | 0.83               | T(e)        | Sapotaceae       | Baraloto       |
| <i>Protium opacum</i>              | 1.354 (1.178–1.556) | 0.824 | 39                      | 1.197  | 153.82                | 128.53                                 | 3.12              | 0.67               | T(e)        | Burseraceae      | Baraloto       |
| <i>Protium sp1</i>                 | 1.266 (1.08–1.485)  | 0.809 | 33                      | 0.830  | 101.86                | 122.74                                 | 3.46              | 0.72               | T(e)        | Burseraceae      | Reich1         |
| <i>Protium sp2</i>                 | 1.175(1.012–1.364)  | 0.885 | 24                      | 0.703  | 74.13                 | 105.44                                 | 7.19              | 0.71               | T(e)        | Burseraceae      | Reich1         |

(Continued.)

| species                          | $\beta$ (95% CI)    | $r^2$ | sample size per species | LM (g) | LA (cm <sup>2</sup> ) | SLA (cm <sup>2</sup> g <sup>-1</sup> ) | LA <sub>VAR</sub> | SLA <sub>VAR</sub> | growth form | family          | data source    |
|----------------------------------|---------------------|-------|-------------------------|--------|-----------------------|----------------------------------------|-------------------|--------------------|-------------|-----------------|----------------|
| <i>Protium</i> sp3               | 1.019 (0.944–1.101) | 0.956 | 33                      | 0.908  | 79.43                 | 87.50                                  | 3.96              | 0.97               | T(e)        | Burseraceae     | Reich1         |
| <i>Quercus ilex</i>              | 1.15(1.069–1.237)   | 0.903 | 75                      | 0.057  | 2.87                  | 50.12                                  | 3.71              | 0.91               | S(e)        | Fagaceae        | Milla1         |
| <i>Quercus xalapensis</i>        | 1.07(1.02–1.123)    | 0.943 | 100                     | 0.141  | 19.54                 | 138.68                                 | 9.15              | 0.57               | T(d)        | Fagaceae        | Reich2         |
| <i>Quercus cocifera</i>          | 1.069 (0.988–1.157) | 0.885 | 75                      | 0.029  | 1.45                  | 50.58                                  | 2.86              | 0.85               | S(e)        | Fagaceae        | Milla1         |
| <i>Quercus ellipsoidalis</i>     | 1.257 (1.076–1.469) | 0.932 | 15                      | 0.256  | 44.36                 | 172.98                                 | 11.47             | 0.84               | T(d)        | Fagaceae        | Williams-Liner |
| <i>Retinophyllum truncatum</i>   | 1.077 (0.98–1.183)  | 0.918 | 40                      | 0.376  | 30.76                 | 81.85                                  | 4.17              | 0.90               | T(e)        | Rubiaceae       | Reich1         |
| <i>Rhamnus alaternus</i>         | 1.201 (1.081–1.334) | 0.871 | 49                      | 0.044  | 4.14                  | 93.11                                  | 3.38              | 0.78               | S(e)        | Rhamnaceae      | Castro-Díez    |
| <i>Rhodognaphalopsis humilis</i> | 0.984 (0.854–1.134) | 0.922 | 19                      | 0.415  | 28.91                 | 69.66                                  | 5.72              | 1.03               | T(e)        | Malvaceae       | Reich1         |
| <i>Rhus typhina</i>              | 1.249 (1.065–1.465) | 0.961 | 10                      | 0.072  | 11.75                 | 164.06                                 | 2.16              | 0.83               | S(d)        | Anacardiaceae   | Shipley        |
| <i>Rinorea amapensis</i>         | 0.974(0.854–1.111)  | 0.817 | 45                      | 0.162  | 29.72                 | 183.65                                 | 3.26              | 1.03               | T(e)        | Violaceae       | Baraloto       |
| <i>Rubus allegheniensis</i>      | 1.054 (0.975–1.14)  | 0.992 | 9                       | 0.059  | 25.35                 | 431.52                                 | 2.85              | 0.94               | S(d)        | Rosaceae        | Shipley        |
| <i>Rubus idaeus</i>              | 1.143 (0.809–1.616) | 0.813 | 10                      | 0.044  | 15.78                 | 357.27                                 | 1.84              | 0.92               | S(d)        | Rosaceae        | Shipley        |
| <i>Rudbeckia hirta</i>           | 1.309 (1.053–1.629) | 0.927 | 10                      | 0.015  | 2.54                  | 165.58                                 | 4.26              | 0.64               | H(d)        | Asteraceae      | Shipley        |
| <i>Ryania pyrifera</i>           | 0.782 (0.641–0.954) | 0.857 | 18                      | 0.414  | 56.49                 | 136.46                                 | 4.03              | 1.35               | T(e)        | Salicaceae      | Baraloto       |
| <i>Sagotia brachysepala</i>      | 1.354 (1.131–1.622) | 0.934 | 12                      | 0.478  | 79.25                 | 165.96                                 | 6.98              | 0.50               | T(e)        | Euphorbiaceae   | Baraloto       |
| <i>Salix herbacea</i>            | 1.133 (1.014–1.267) | 0.949 | 20                      | 0.008  | 0.88                  | 109.40                                 | 3.11              | 0.78               | T(d)        | Salicaceae      | Roderick       |
| <i>Salix babylonica</i>          | 1.216 (1.108–1.335) | 0.941 | 30                      | 0.057  | 8.83                  | 154.17                                 | 2.32              | 0.89               | S(d)        | Salicaceae      | Kudo           |
| <i>Saxifraga canaliculata</i>    | 1.452 (1.239–1.701) | 0.805 | 34                      | 0.002  | 0.17                  | 72.95                                  | 2.67              | 0.64               | S(e)        | Saxifragaceae   | Milla2         |
| <i>Schizachyrium scoparium</i>   | 0.994 (0.708–1.396) | 0.820 | 10                      | 0.025  | 4.43                  | 176.60                                 | 2.06              | 1.00               | G(e)        | Poaceae         | Reich2         |
| <i>Solanum crinitum</i>          | 1.359 (1.152–1.603) | 0.909 | 17                      | 0.743  | 113.50                | 152.76                                 | 1.66              | 0.87               | H(d)        | Asteraceae      | Shipley        |
| <i>Solidago canadensis</i>       | 1.273 (1.037–1.564) | 0.936 | 10                      | 0.018  | 2.49                  | 136.77                                 | 6.23              | 0.52               | T(e)        | Poaceae         | Reich3         |
| <i>Sorghastrum nutans</i>        | 1.006 (0.794–1.276) | 0.855 | 14                      | 0.060  | 10.16                 | 170.22                                 | 6.41              | 0.99               | G(d)        | Poaceae         | Reich2         |
| <i>Sterculia pruriens</i>        | 1 (0.904–1.105)     | 0.909 | 39                      | 5.284  | 636.80                | 120.50                                 | 11.91             | 1.00               | T(e)        | Makaceae        | Baraloto       |
| <i>Symphonia globulifera</i>     | 0.94(0.82–1.078)    | 0.962 | 12                      | 0.244  | 35.97                 | 147.23                                 | 3.07              | 1.07               | T(e)        | Clusiaceae      | Baraloto       |
| <i>Symphonia</i> sp1             | 1.034 (0.898–1.191) | 0.809 | 41                      | 0.186  | 25.94                 | 139.32                                 | 3.08              | 0.96               | T(e)        | Clusiaceae      | Baraloto       |
| <i>Syzygium suborbiculare</i>    | 0.966 (0.796–1.174) | 0.863 | 18                      | 0.822  | 59.98                 | 72.95                                  | 3.77              | 1.05               | T(sd)       | Myrtaceae       | Prior          |
| <i>Tapura guianensis</i>         | 1.157 (0.999–1.339) | 0.828 | 35                      | 0.402  | 45.81                 | 114.02                                 | 5.81              | 0.76               | T(e)        | Dichapetalaceae | Baraloto       |
| <i>Taraxacum laevigatum</i>      | 1.106 (0.966–1.265) | 0.973 | 10                      | 0.027  | 13.52                 | 503.50                                 | 2.37              | 0.91               | H(d)        | Asteraceae      | Shipley2       |
| <i>Terminalia ferdinandiana</i>  | 1.104 (0.993–1.227) | 0.960 | 18                      | 1.169  | 115.61                | 98.86                                  | 2.91              | 0.89               | T(d)        | Combretaceae    | Prior          |
| <i>Turpinia insignis</i>         | 1.108 (1.078–1.139) | 0.982 | 98                      | 0.230  | 26.49                 | 115.08                                 | 17.36             | 0.73               | T(e)        | Staphyleaceae   | Williams-Liner |
| <i>Unonopsis stipitata</i>       | 1.334 (1.187–1.499) | 0.955 | 17                      | 0.640  | 86.10                 | 134.59                                 | 20.04             | 0.37               | T(e)        | Annonaceae      | Baraloto       |
| <i>Vaccinium vitis-idaea</i>     | 0.97(0.802–1.174)   | 0.850 | 20                      | 0.004  | 0.20                  | 51.64                                  | 2.72              | 0.86               | S(d)        | Ericaceae       | Reich4         |
| <i>Vaccinium myrtilus</i>        | 1.156 (0.913–1.462) | 0.843 | 15                      | 0.019  | 3.42                  | 177.42                                 | 3.74              | 1.04               | S(e)        | Ericaceae       | Kudo           |
| <i>Viburnum tinus</i>            | 1.167 (1.067–1.277) | 0.957 | 25                      | 0.163  | 16.75                 | 103.04                                 | 3.02              | 0.83               | S(e)        | Caprifoliaceae  | Castro-Díez    |
| <i>Vinca minor</i>               | 1.208 (1.087–1.342) | 0.926 | 30                      | 0.031  | 6.28                  | 204.17                                 | 7.67              | 0.65               | H(e)        | Apocynaceae     | Roderick       |
| <i>Vismia laurifolius</i>        | 1.174 (1.024–1.347) | 0.830 | 39                      | 0.353  | 62.66                 | 177.42                                 | 4.88              | 0.76               | T(e)        | Myristicaceae   | Baraloto       |
| <i>Wrightia pubescens</i>        | 1.11(0.977–1.26)    | 0.811 | 49                      | 0.836  | 86.90                 | 103.99                                 | 8.23              | 0.79               | T(e)        | Clusiaceae      | Reich1         |
| <i>Xanthostemon paradoxus</i>    | 0.776 (0.647–0.932) | 0.880 | 18                      | 0.134  | 25.88                 | 192.75                                 | 2.34              | 1.21               | T(d)        | Apocynaceae     | Prior          |
|                                  | 1.236 (1.078–1.418) | 0.933 | 18                      | 1.349  | 98.86                 | 73.28                                  | 2.79              | 0.78               | T(sd)       | Myrtaceae       | Prior          |

## Electronic supplementary material B

### Statistics to calculate the effects of growth form, ecosystem of origin and phylogeny on beta scores

To investigate whether  $\beta$  differs between growth forms, we divided our set of species into trees, vines, shrubs, forbs and grasses, and each group was subsequently split into evergreen and deciduous leaf habit type. Owing to significant heteroscedasticity and unbalanced sample size between groups, we used a parameter-free Kruskal–Wallis ranks analysis to compare scaling exponents among growth forms. Similarly, we grouped our dataset as a function of the ecosystem of origin (wetlands, tundra-alpine, tropical seasonal forest, tropical rainforest, temperate forest, mediterranean shrublands or gardens) and compared the scaling exponents of each habitat by a Kruskal–Wallis test. All other statistics were performed with SPSS v.13.0.

Species are not independent observations and are related to each other through shared ancestry. To investigate the effect of common ancestry on  $\beta$  scores we proceeded as follows. Nomenclature and family affiliation of our study species were checked against the Missouri Botanical Garden's VAST nomenclatural database (W3Tropicos, <http://mobot.mobot.org/W3T/Search/vast.html>). We then built a pruned phylogenetic tree of the seed plants with the study species as terminal tips using the maximally resolved seed plant tree available in Phylomatic (<http://www.phylodiversity.net/phyloomatic/>). The resulting tree lacks an estimation of accurate distances between related nodes (i.e. assumes equal branch lengths) assuming equal branch lengths can result in biased estimates of phylogenetic distances between taxa when intervening terminal taxa are missing. Although phylogenetic independent contrasts are robust to the equal branch lengths assumption, phylogenetic signal tests are not (Ackerly 2000). Thus, we calibrated the tree by dating the nodes with the Branch Length ADJustment function (BLADJ) of the PHYLOCOM package (Webb et al. 2006). BLADJ assigns branch lengths on the basis of clade age estimates (Wikstrom et al. 2001), with undated nodes assigned equal branch lengths between nodes for which age estimates are available. We thus obtained a node-dated tree, calibrated in millions of years, which was used as the input tree in a phylogenetic signal analysis.

To test for phylogenetic inertia in the evolution of  $\beta$  scores, we used the analysis of traits (AOT) module of PHYLOCOM. AOT calculates divergence–convergence degree at each internal node of the tree. Trait means of daughter nodes are computed from the arithmetic mean of the tips of the tree that are linked by ancestry to the daughter node. Then the standard deviation between trait means of daughter nodes is used as a proxy of the degree of divergence at the focal node (i.e. divergence size). High standard deviations between daughter node arithmetic means indicate divergence, whereas the opposite indicates phylogenetic conservatism at that particular bifurcation. Significance of divergence size is estimated by randomly permuting trait values across the tips of the phylogeny. In total, 10 000 randomizations were conducted, and the placement of each node-level divergence size score within the distribution of the scores of the 10 000 randomizations was used to qualify divergence size at each node as either significant divergence (node-level divergence size at the 5% higher tail of the 10 000 values), significant conservatism (node-level divergence size at the 5% lower tail of the 10 000 values) or nonsignificant change. AOT computes tree-wide conservatism by averaging the node-level scores of divergence size, and tests its statistical significance as explained above. Phylogenetic uncertainty and the presence of polytomies in the input tree may cause biases in phylogenetically explicit analyses. Therefore, although AOT procedures are assumed to be robust to the presence of 'soft' polytomies (Webb et al. 2006), we resolved polytomies in the tree by randomly generating 100 fully resolved trees using MESQUITE (Maddison & Maddison 2006). We then re-sampled 50 of the 100 fully resolved trees randomly and run AOT again separately for each of those 50 trees. This allowed us to check the robustness to phylogenetic uncertainty of our tree-wide conservatism estimate.

## References

- Ackerly, D.D. 2000 Taxon sampling, correlated evolution and independent contrasts. *Evolution* **54**, 1480-1492.
- Maddison, W. P. and D.R. Maddison. 2006 Mesquite: a modular system for evolutionary analysis. Version 1.1 (<http://mesquiteproject.org>).
- Webb, C.O., Ackerly, D.D. & Kembel S.W. 2006 Phylocom: software for the analysis of community phylogenetic structure and trait evolution. Version 3.40. <http://www.phylodiversity.net/phylocom/>.
- Wikstrom, N., Savolainen, V. & Chase M.W. 2001 Evolution of the angiosperms: calibrating the family tree. *Proc R Soc London B* **268**, 2211-2220.

## Electronic supplementary material C

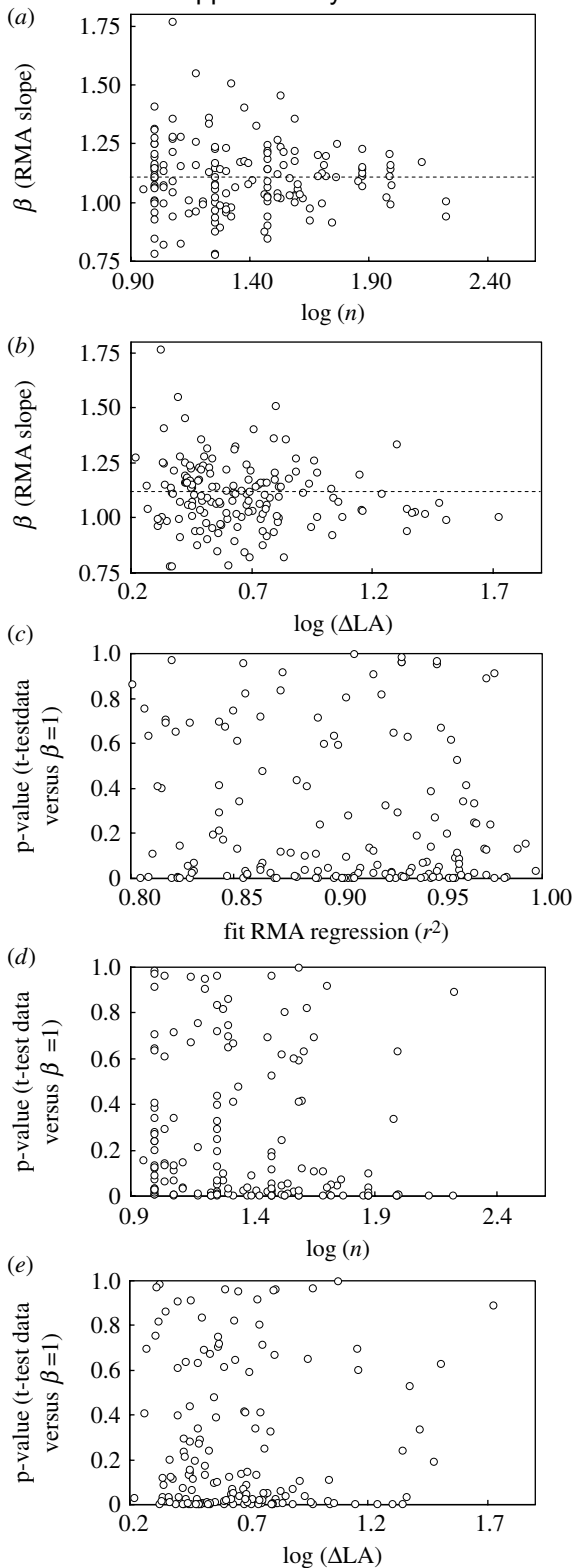

Figure 5. Scatter plots of the  $\beta$  RMA slope, and p value of the likelihood ratio test against  $\beta = 1$ , against log-scaled sample size ( $n$ ), range of leaf area variation ( $\Delta LA$ ) and goodness of fit ( $r^2$ ). Dots are species. Reference line in (a) and (b):  $\beta = 1.10$  (mean  $\beta$  of the 157 species). No simple regression model explained a significant fraction of any scatter.
